# Supplementary material for: P2X7 Receptors and TMEM16 Channels Form a Hub with Implications for Macropore Formation and Current Facilitation
Source: Research Square preprint supplement (doi:10.21203/rs.3.rs-153271/v1), 2021-02-04
Supplement: Supplementary file 1 [file 8b23372368cfd30e018a29a2.docx]

**Supporting Information**

**P2X7 Receptors and TMEM16 Channels Form a Hub with Implications for Macropore Formation and Current Facilitation**

Kate Dunning1†, Adeline Martz1†, Francisco Andrés Peralta1,2, Federico Cevoli1, Eric Boué-Grabot3,4, Antoine Taly5,6, Vincent Compan7,8, Fanny Gautherat1, Patrick Wolf1,Thierry Chataigneau1, Thomas Grutter1,2*

1University of Strasbourg, Centre National de la Recherche Scientifique, CAMB UMR 7199, F-67000 Strasbourg, France. 2University of Strasbourg Institute for Advanced Studies (USIAS), Strasbourg, France. 3Université de Bordeaux, Institut des Maladies Neurodégénératives, UMR 5293, F-33000 Bordeaux, France. 4CNRS, Institut des Maladies Neurodégénératives, UMR 5293, F-33000 Bordeaux, France. 5CNRS, Université de Paris, UPR 9080, Laboratoire de Biochimie Théorique, 13 rue Pierre et Marie Curie, F-75005, Paris, France. 6Institut de Biologie Physico-Chimique-Fondation Edmond de Rothschild, PSL Research University, Paris, France. 7Institut de Génomique Fonctionnelle (IGF), University of Montpellier, CNRS, INSERM, Montpellier, France. 8Laboratoire d'Excellence Canaux Ioniques d'Intérêt Thérapeutique (LabEx ICST), Montpellier, France.

* Correspondence author: Thomas Grutter. **Email:**  grutter@unistra.fr

**This PDF file includes:**

Figures S1 to S6

References


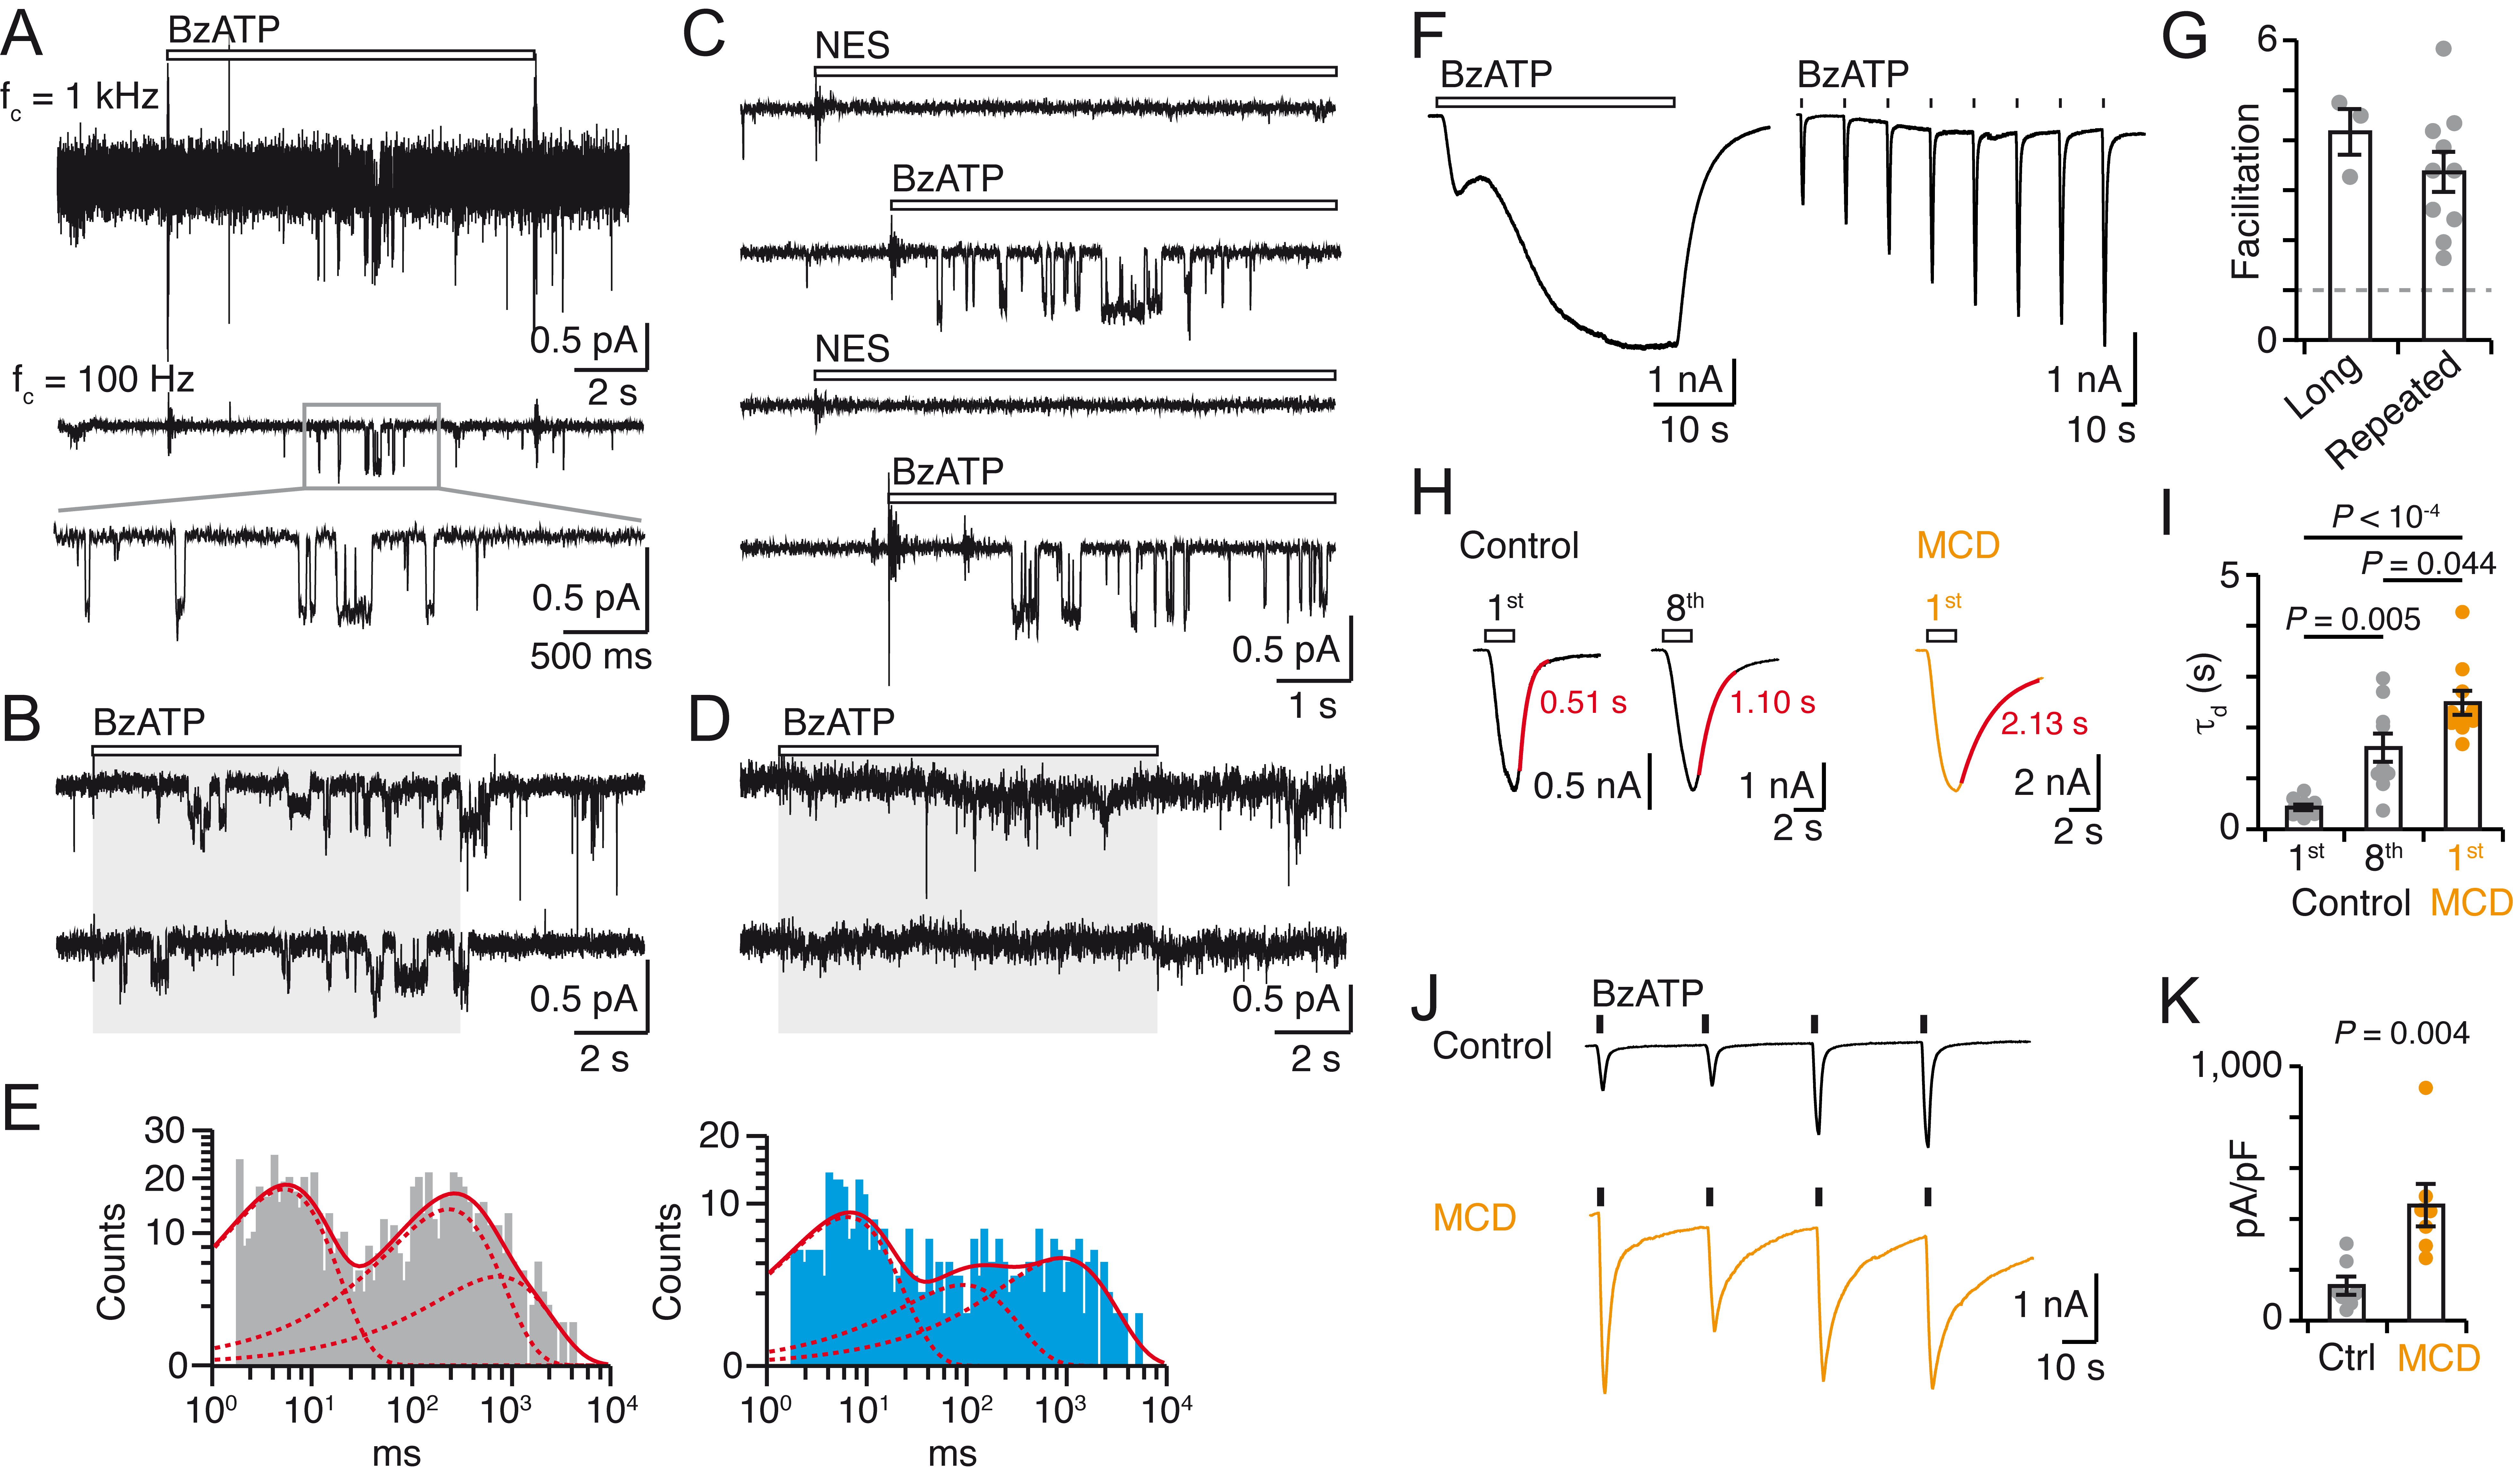


**Fig. S1. Whole-cell and single-channel studies of P2X7: controls and additional data.** (A) Full recording of a sweep showing single-channel currents evoked by 10 M BzATP (duration of application indicated by the white bar) from an outside-out patch of HEK293T cell transiently transfected with rP2X7. Data were acquired at 10 kHz and filtered at a corner frequency (fc) of either 1 kHz (upper trace) or 100 Hz (lower trace). Inset shows an expanded view of the recording filtered at 100 Hz. (B) Another example of single-channel recording (10 M BzATP). Note that currents disappear upon washout. Shown sweeps were sequentially recorded from the same patch. Duration of application is indicated by the white bar and grey shading. (C) BzATP (10 M), but not reduced divalent cation NES, elicits single-channel activity in an outside-out patch of rP2X7-expressing HEK293T cell. Shown sweeps were sequentially recorded from the same patch, in which NES and BzATP were alternatively applied (NES: Normal Extracellular Solution). (D) No single-channel events (representative from 4 tested cells) are observed in response to BzATP perfusion in an outside-out patch excised from non-transfected cell. Shown sweeps were sequentially recorded from the same patch. (E) Closed dwell-time histograms for control (grey) and facilitated (blue) conditions, fitted by the sum (solid red line) of several exponential functions (dashed red lines). For control patches, 1 = 5.2 ms, a1 = 0.49; 2 = 237 ms, a2 = 0.39; 3 = 746 ms, a3 = 0.12; mean closed time C = 185 ms. For facilitated patches, 1 = 6.4 ms, a1 = 0.55; 2 = 92 ms, a2 = 0.16; 3 = 899 ms, a3 = 0.29; C = 279 ms. (F) Example of traces recorded from a rP2X7-transiently expressing HEK293T cell, showing the effect of facilitation on whole-cell currents from a sustained, long application of 30 s (*left*) or from repeated 2 s applications of 10 M BzATP (*right*). (G) Summary of current facilitation determined between the end and beginning of long application or between the 8th and 1st application. (H) Expanded views of currents, shown in panel G, induced by the first and eighth application of BzATP in untreated (black traces) or MCD-treated HEK293T cells (orange trace). Deactivation currents were fit by single exponentials (red traces) and time constant of deactivation (*d*) values are indicated. (I) Summary of time constant determined from first and eighth application in untreated cells and first application in MCD-treated cells (n = 9 cells for untreated condition and 10 cells for MCD-treated condition). *P* values are from paired Student’s *t*-test (between first and eighth application data in control) and from Mann-Whitney test (between MCD and control data). (J) Typical whole-cell currents evoked by repeated 2 s applications of 10 M BzATP in rP2X7-transiently expressing HEK293T cells either untreated (black trace) or treated by MCD (orange trace). (K) Summary of current density determined from first application in control cells and in MCD-treated cells (n = 7 cells for both conditions). *P* value is from unpaired Student’s *t*-test. Single-channel and whole-cell data were recorded at -120 and -60 mV, respectively. Single-channel data were filtered at a final fc of 100 Hz unless specified.


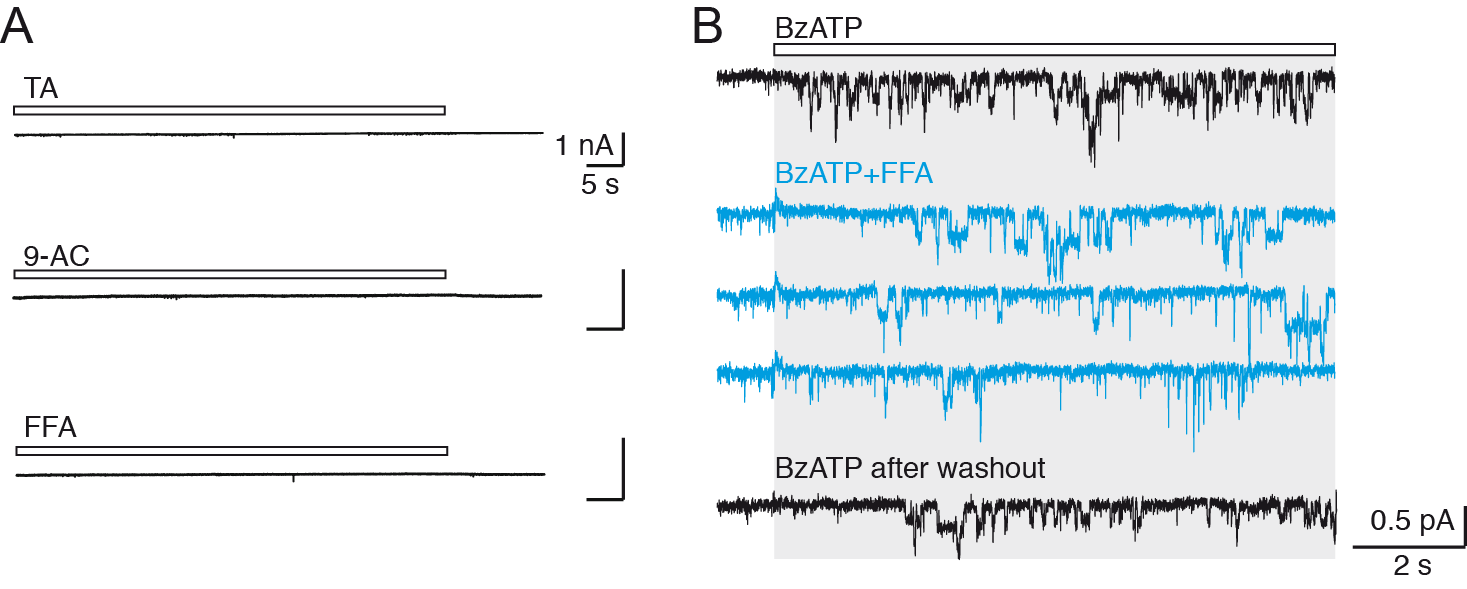


**Fig. S2. Whole-cell and single-channel recordings during CaCC inhibitor application.** (A) Application of 20 M TA (duration of application indicated by the white bar), 1 mM 9-AC or 100 M FFA for 60 s does not induce whole-cell currents in HEK293T cells transiently transfected with rP2X7. Data were recorded at -60 mV. (B) Single-channel rP2X7 currents elicited by 10 M BzATP from an outside-out patch of HEK293T cells (black traces) are partially inhibited by 100 M FFA when co-applied with 10 M BzATP (BzATP+FFA, blue traces). Shown sweeps were sequentially recorded from the same patch. Note that inhibition is reversible after washout. Duration of application is indicated by the white bar and grey shading. Data were recorded at -120 mV, and filtered at a final fc of 100 Hz.

**
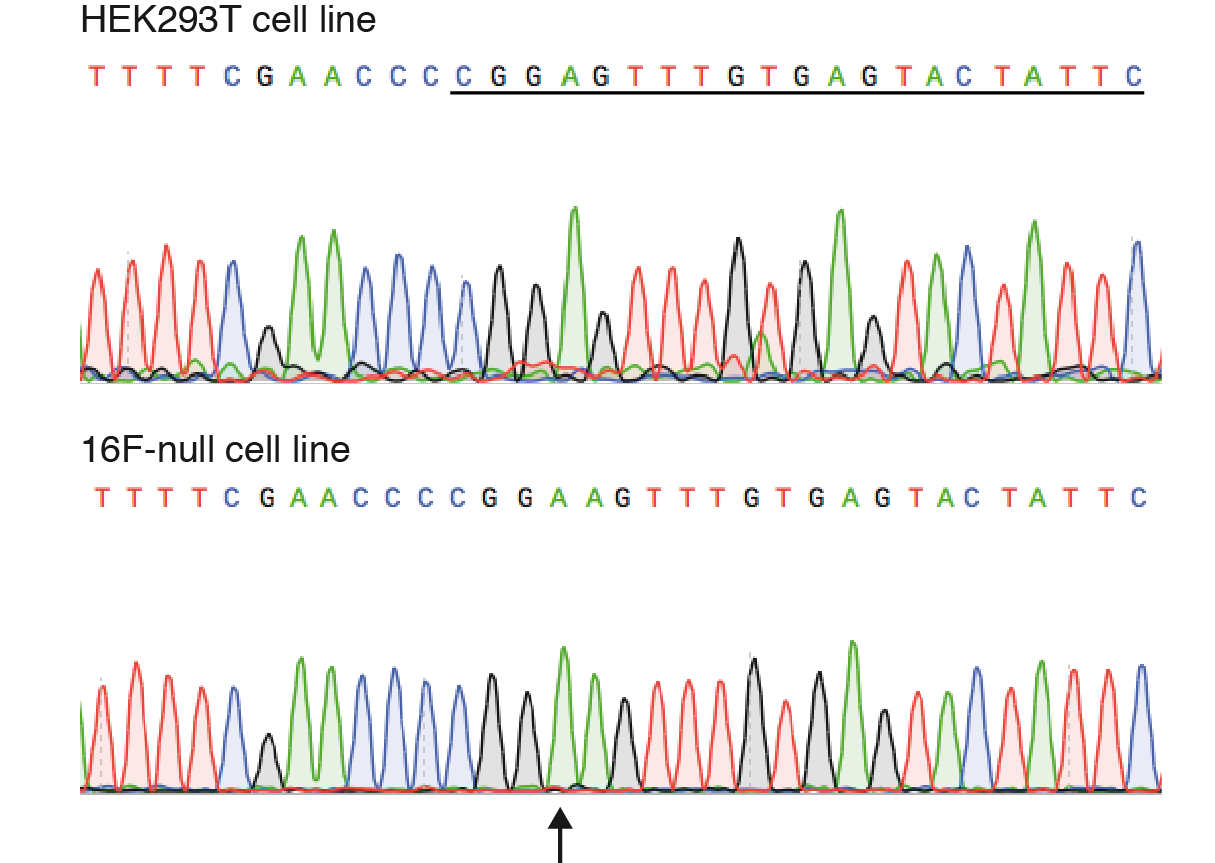
**

**Fig. S3. CRISPR/Cas9 knockout of *TMEM16F* by a one nucleotide insertion.** Sequencing chromatogram of the exon 2 region of endogenous *TMEM16F* genomic DNA in HEK293T cell line (upper) and 16F-null cell line (lower) where one nucleotide (A, indicated by black arrow) has been inserted, creating an erroneous frameshift mutation. The underlined sequence in HEK293T cell line indicates the sgRNA target sequence.

**
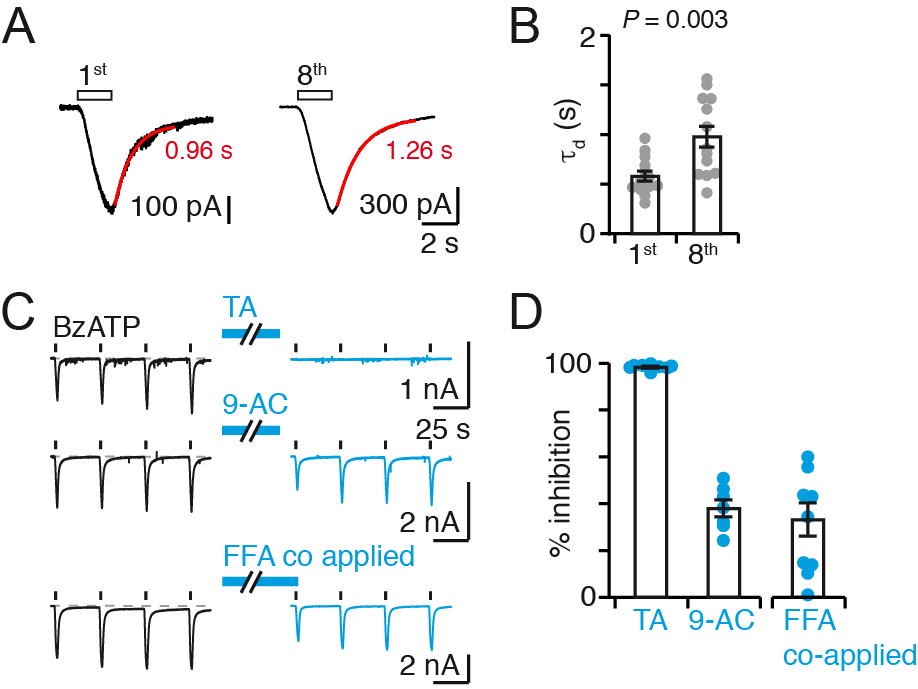
**

**Fig. S4. Deactivation kinetics and CaCC inhibition in 16F-null cells.** (A) Expanded views of currents induced by the first and eighth application of BzATP in 16F-null cells transiently expressing rP2X7. Deactivation currents were fit by single exponentials (red traces) and time constant of deactivation (*d*) values are indicated. (B) Summary of time constant (n = 13 cells). *P* value is from paired Student’s *t*-test. (C) Whole-cell currents evoked by repeated 2 s applications of 10 M BzATP before and after perfusion of TMEM16 inhibitors in 16F-null cells transiently expressing rP2X7 using the same protocol as described in Fig 2A. (D) Summary of inhibition calculated as in Fig. 2B (n = 8 cells for TA, 7 for 9-AC, and 9 for FFA co-applied). Bars represent mean ± SEM. Data were recorded at -60 mV.


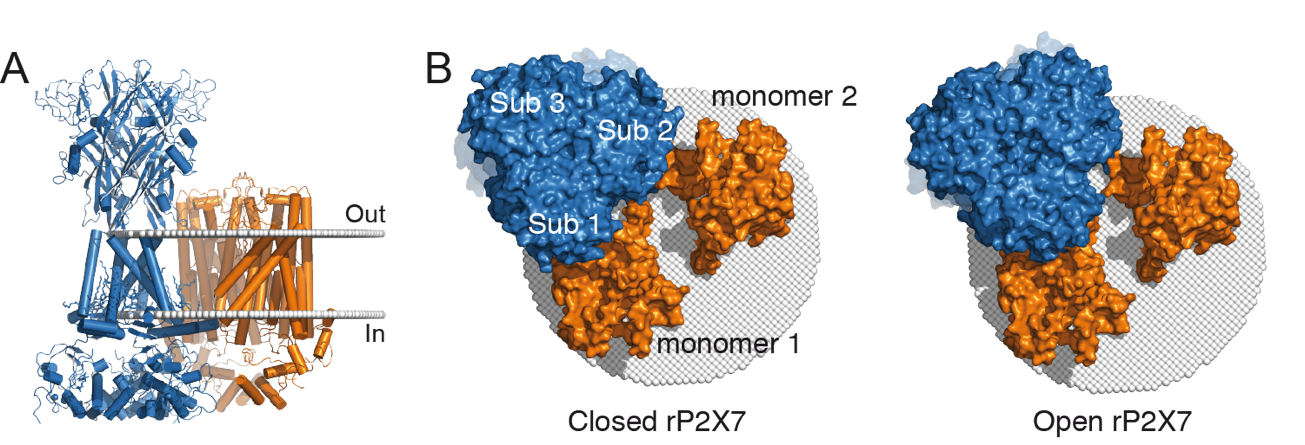


**Fig. S5. Molecular model of P2X7/TMEM16F complex.** (A) Molecular docking model of rP2X7 in the *apo*, closed channel state (blue, PDB ID: 6u9v)1 and Ca2+-bound mTMEM16F (orange, PDB ID: 6qpc)2 produced by a Monte-Carlo experiment. The model is shown in cartoon representation and viewed parallel to the membrane plane (delimited by white spheres). (B) Bottom up views from the cytoplasmic surface of the models in closed (*left*) and open (*right*) channel state of P2X7. P2X7 subunits as well as TMEM16F monomers are indicated. Models are shown in surface representation.


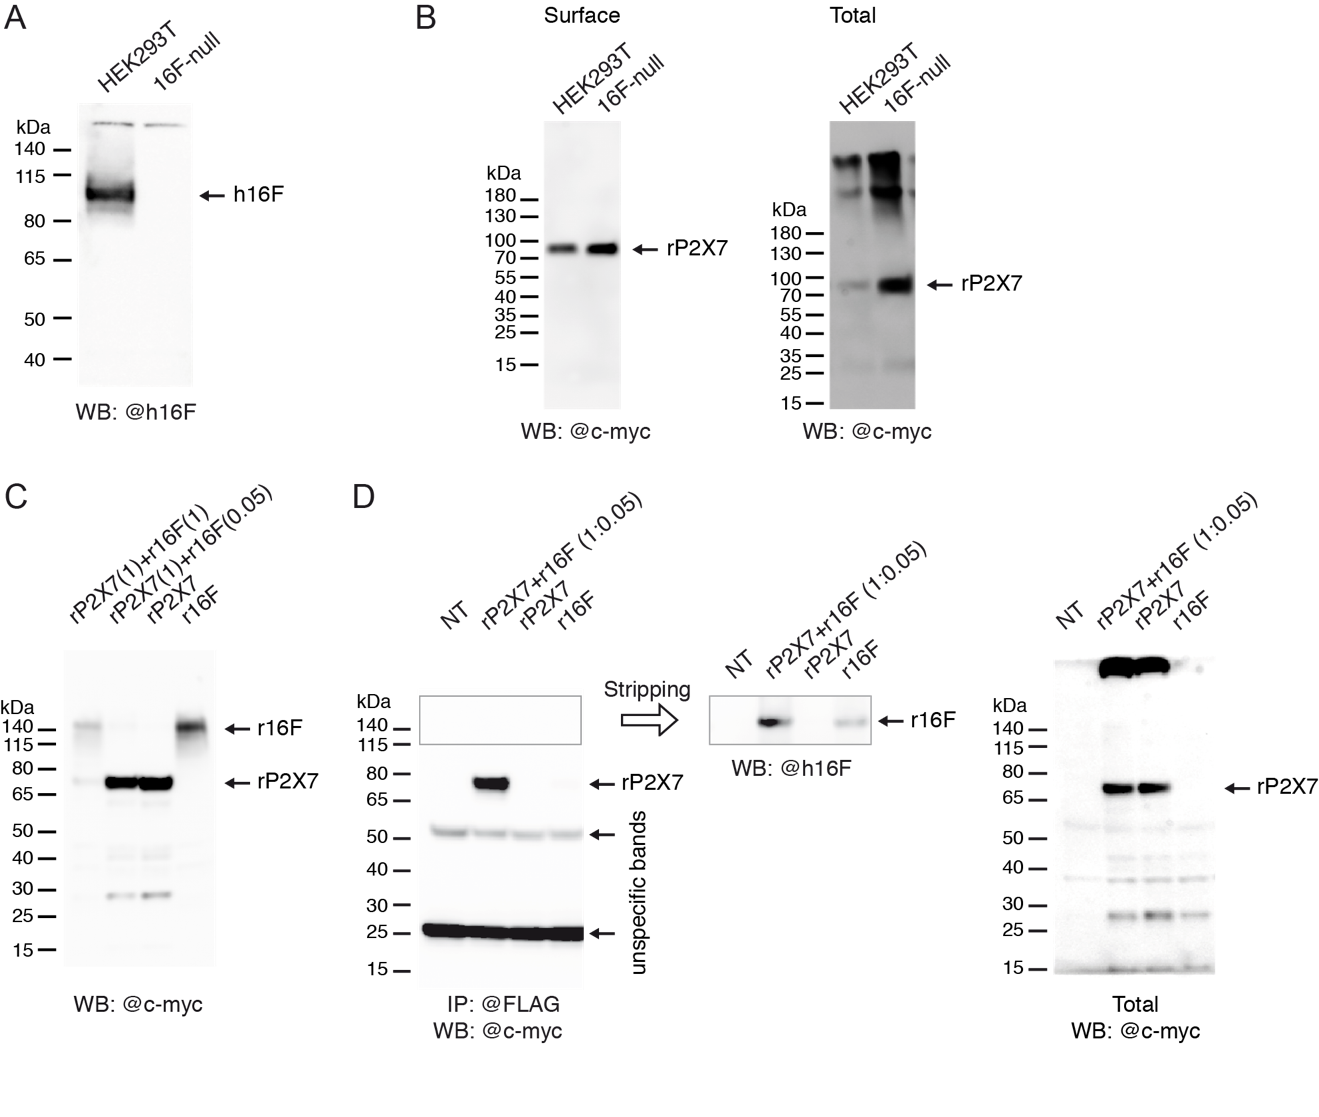


**Fig. S6. Uncropped blots of Fig. 5A (A), Fig. 5B (B), Fig. 6A (C) and Fig. 6B (D).** Inset in panel D demonstrates the presence of r16F in IP experiment shown in Fig. 6B. It shows re-probing of IP blot with anti-hTMEM16F antibody (@h16F diluted at 1:1,000) after stripping.

References

1 McCarthy, A. E., Yoshioka, C. & Mansoor, S. E. Full-Length P2X7 Structures Reveal How Palmitoylation Prevents Channel Desensitization. *Cell* **179**, 659-670 e613, doi:10.1016/j.cell.2019.09.017 (2019).

2 Alvadia, C. *et al.* Cryo-EM structures and functional characterization of the murine lipid scramblase TMEM16F. *Elife* **8**, doi:10.7554/eLife.44365 (2019).
